# Supplementary material
Source: PubMed Central journal article supplement (PMC60095)
Supplement: pnas_98_22_12572__3.pdf [file pnas_98_22_12572__3.pdf]

ZmPifA -----MRERRRKKRLRVASLFVATVMGMIAEYRKRPRHLMDPSEVIERDVAGRKQMLRNLYOGSNVYCYDSLRLTKR  
OsPif2 MDRRKQIYLQYYFSSYYQYIWRRLVLAIAICVASYSYLLDMRKRQREGVRYSPMLLRDVE-RDARLNRLFNTEANCVSELRMRKA  
OsPif1 -----MNSLIRKSKDEEEDIEIMFWLPALYLLTS-----NGGIEKRVRHTSSQYSEEKLRNILEGHEKNCLVAFRMEPN  
AtPif1 -----MEISGEED--KEEAVTLPEKVSKISTSDGNKFVYQILNGPNEQCFENFRMDKP  
AtPif2 -----MERNLCEEDSDVDIMLLMVVGSVDAYESQIPRPMRQITKKGHAYIQKALKDDPIHFRQLY-----RMNPE  
FnPif1 -----MATILNHKQLKASLSIPYHALRTS-----RYLNRPKKYQLRSRDAVARITSTHEIPDEDFRKRLRVNHT  
CbPif1 -----MLLKLKDLLKNNPPNNWKLLEFEFQ-----VV  
CePif1 -----MSRRWGLAPTTVANAVYHVTNAIN-----  
CePif2 -----MHGLSQPTISRIVCGVIDDLVRVST-----EYI  
IS493 -----GLDVSSALRFLSARLREHRRGLGT-----RWRRL  
IS470 -----MPTSVTYTAVLDVRRSTAETHLAGLLCDHRIVARTRK-----RRALG  
IS112 -----VAGVITAS--EPSWIAFSGLSPRQFGKLVTVLRREGADAVRK-----RPWSL  
IS702 -----VKIEKAKQLTARKFKRMSGVSRQTFNYMVDVVKADEKKKKPK-----RRPKL  
ISL2 -----MKYETAKNLNTRFKRLIGVAKPVFDEMVKVLAKEYQVKHARG-----RKPPL  
IS5 -----MSHQLTFADSEFSSKRRQTRKEIFLSRMEQILPQNMVEVIEPFYPKAGNCR-----RPYPL

ZmPifA SFDLCTILRERCMDCT--LNVSVEEKVAIFLLVVGHG--TKMRMIRSSYGWSLEPISRYFNEVLRGVLSLCHFIKLPDPLAVQ  
OsPif2 IEFKLCGHFRSRLVLDV--LHVTVEEQIAMFMHIVGHK--WCNRSVGFEEFRSGEIVSRYFNAVLDLSVLSKELIYIRSTETHP  
OsPif1 IFRRAIVTYLRTEHLRDT--RGITVEEKLGHFLYMISHN--ASYEDLOHEFFHSGEITHRHKAIVKFKVIPSITRYFIKQTTREVTH  
AtPif1 VRYKLCDLLQTRGLLRHT--NRKIEAQLAIFLFIIGNH--LRTRAVQELFCYSGETISRHFNNVNLNAVIAISKDFQ--PNSNSDT  
AtPif2 VEAELCHLLQMKTLGKGT--PHVCVEEMVATFLITVGQN--SRYCHTMDTFKRKSFSTINFKHVLRLALNMLAPTLMAKVNTNVP  
FnPif1 EFRKLLCLIKDHPVVFVSHGPRKQANPLLQLTVALYRLGHCGCAASTFEIGEQFGVSEGTSAIWTTRVIKAILSLERNVYWPDENRKP  
CbPif1 VRFQYFTSG-----QSAGCIARRIGISKSIVSAIVKRVEVIN--KNYDNIRIPSKPED--  
CePif1 SRMKCIETPK-----SAE-----EW-----RKVERTFAK-----KHILR-----  
CePif2 KFPPTSDEIET-----MTKKFYEKEDS-----NGEER-----  
IS493 SAGRQALLALAHLRNGHP-----YVQLAAGFGVGTTFAYRYVTEAAEVLAALAPTAEAVRAA-----  
IS470 CEKQAVLVLRWFLDGT-----LAQLARDNGLSVSTSYRYLHEGLAVLAAGAPDLSTALR-----  
IS112 PLEDRALLVAAYWRTNLT-----MRQLAPLFGVSKSAADRIIDHLGP--MLAQ-----PRK-----  
IS702 IIEDQVLMVIQYWRERYT-----YHIGLDWGLSESACRTVYKIENLISSRKFSPLPGKELLKM  
ISL2 AIEDLLLATLQYLKEYRT-----YEQLAADYGVHDSNLIERSHWAETLVKHGFNIG--KQE-----  
IS5 ETMLRIHCMQHWNLSDG-----AMEDALYEIASMR-----LFARLSLDSALPDRITIMNFRHLLLEHQHQLARQLFKTINRWLAE

ZmPifA PEDSK---WRWFEDCLGALDGTIDVFPV-----LADQGRYRNRKQ---QITTNVLGVCDRHMKFVYVLAGWEGSASDS-----  
OsPif2 KITSSPGRFHPYFEGCLGALDGTHTVPASVP-----AHMQDRFRGRKK---SPTQNVLAAVDFDLRFIYVLAGWEGSAHDS-----  
OsPif1 WKISTDQLFFPYFQNCCLGALDGTHTVPTTIS-----QDLQAPYRNRKQ---TLSONVMLVCDFDLNFIFIPSGWEGSATDA-----  
AtPif1 LENDD---PYFKDCVGVVDSFHIPVMVG-----VDEQGPFRNGNG---LLTONVLAASSFDLRFNYVLAGWEGSASDQ-----  
AtPif2 SKIKSTTRFYPYFKDCVGAIDGTHINAMVQ-----GPEKASVNRNRKQ---VISONVLAACNFDLEFLYVLAGWEGSAHDS-----  
FnPif1 AIDRHFEEDDIPDGCVGIIDGFHVPFAYKPA---RHDADVFSYKQ---RYGFNIGLTCDLHLKRIRYFYQYGPASAHDARIFKNCS  
CbPif1 WRDIKETFVRRGLKCLGALDGTGKHVRVKAP-----PNSGSLFNRKQ---FFSFAPGLVLRANLRFVVDIGIPGVSVD-----  
CePif1 -----CLGSLDGKHIRIKAP-----PHSGSLFNYKH---FFSVLVVVVDADGRVIWVDVGSVPSNDA-----  
CePif2 -----RMPCYGIVDGGKHWRCHEP-----PKSGALNYNYKQ---FFSFNSLVVSDSDYRILFVQMKCNGLNSDAQLYQN--  
IS493 -----SMKAFVLLDGTLLPLDRI-----AADRPFVSGKHK---KHGMNVQVIADPSGRLLWASPALPGAVEDV-----  
IS470 -----AKAAGPHTLNDGTVIRTRVAAPGP--NGADLRWVSGKHK---HHGGNVQVIATPFGWPIWVSPVRPGRREDTTCAR-----  
IS112 -----RFAKDTVLIVDGTLPVTRDH-----TIAERSKNYR---YSTNHQVVIDADTRLVVV--VGRPLAGNRN-----  
IS702 P-----SQENLVVMDVTESPIERP-----KSQKKFSGKAG---EHTLKTQLVIHQKTSQIICLGHGKGRIDHDF-----  
ISL2 -----IKPDDVVLIDATEVKIQRPK---KDKQLIIPARKS---STVLKAQATDTTGRILHL--DSCQAYRHM-----  
IS5 G-----VMMTQGTLDATIIEAPSSTKNKEQQRDPMEHQTKKGNQWHFGMKAHTGVDAKSGLTSHSLVTAANEHDLN-----

ZmPifA -----RV---IRDAMSRL-----DDAFATPS-GKYLLVDAGYTNPG--GFLAPYRSTRYHLNEWAAQGNPNPNAKELFNLRHSTAR  
OsPif2 -----HV---IQDALSRL-----PSGLKIPK-GKFFLADAGYAARP--GILPPYRGVRYHLKEYKG--GREPQDYKELYNHRHSSCR  
OsPif1 -----RV---IRSAMLR-----GFNVQK-GKYLLVDGGYANTP--SFLAPYRGVRYHLKEFGRGQQRPRNYKELFNHRHAILR  
AtPif1 -----QV---LNAALTR-----RNKLQVQK-GKYLLVDNKNVNLN--GFIAPYHGVSTNSREE-----AKEMFNERHKLHL  
AtPif2 -----KV---IQDALTRR-----TNRLQVPE-GKYLLADCGFPNRR--NFLAPLRSTRYHLQDFRGEGRDPTNQNELFNLRHASLR  
FnPif1 LFEEANADAQS---NREAMLQK---RAVHSEMISQ-GEYLLADSAFPAG--DWCVPLFKRRRGQNDLDR---P---EAKFNKCCSSAR  
CbPif1 -----SI---YENSKLKE---ILQKKEPIPK-PIFLTSNYIMPSFV--VDGIFPLDITLLKPYGRPP--LSNDQVLENNIFSCTR  
CePif1 -----SI---FSDSKLKT---ILDEEANLPP-PTFWSRDFVVKPFV--IADGIFKITPRMNTLYGGNG--LNISQKVLNKKLSRAR  
CePif2 -----GPLPRL---ITKALENVGYRTLPDPNVLN-PPFILADNGFLGHK-SMMQPYRPTQIGLNPE-----ENISENFKLSGTR  
IS493 -----RA---AREHGII-----DTLATA-DVNCWADKGVQAGGTVRVPYRG--RWETLSAG-----QQAVNRSHAKIR  
IS470 -----HHG---VVEALNR-----IAAEL-DMPTLVDFG-YENAGDGRHPPKPKPAGESELTEE-----QQTYNKVIIRGHI  
IS112 -----DCKAWEE-----SGAKAAVG-KTLTADGGYPTG--GLVIPHRRERGAGLDP-----WKEEHNKSHKQVR  
IS702 -----RL---FKTSGVK-----FSE-LLKVIADKGVQGIT--KIKHKLSETPIKPKGKK-----LAKEQKYNRELNRLR  
ISL2 -----RL---IRRSRRS-----LHR-SGLILADSGYQGLD-KIYFQAKTPVKSSKKKPP-----LTQDQRELNHLISSIR  
IS5 -----QLGN---LHGEEQFVSADAGYQAGPQREELAEDVDVLDLIAE--RPGKVRTLKHPRKKNK-----TAINIEMKASIR
